# Supplementary material for: Chromosome fusions repatterned recombination rate and facilitated reproductive isolation during Pristionchus nematode speciation
Source: PubMed Central journal article supplement (PMC9998273; doi:10.1038/s41559-022-01980-z), 2023-01-30
Supplement: 41559_2022_1980_MOESM1_ESM.pdf [file 41559_2022_1980_MOESM1_ESM.pdf]

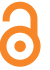

---

# Chromosome fusions repatterned recombination rate and facilitated reproductive isolation during *Pristionchus* nematode speciation

---

In the format provided by the authors and unedited

1 **Table of contents**

2

| <b>Contents</b>         | <b>Page</b> |
|-------------------------|-------------|
| Supplementary Note      | 2           |
| Supplementary Fig. 1-14 | 5           |
| Supplementary Table 1-7 | 19          |
| Reference               | 27          |

3

## 4 **Supplementary Note**

5

### 6 **Reproductive isolation between *P. pacificus* and *P. exspectatus***

7 In hybrid crosses, we observed strong reduction of progeny numbers relative to pure  
8 crosses of the parental species (Fig. 1d). This might be explained by premating isolation,  
9 postmating prezygotic isolation and/or hybrid inviability of F1 animals. The finding that all  
10 hybrid crosses produced progeny (Fig. 1c) suggests that premating isolation is not strong.  
11 However, we cannot exclude the possibility of inefficient mating. The number of progeny with  
12 immature morphology in hybrid crosses was low (Fig. 1e), suggesting that hybrid progeny  
13 develop normally with regard to their morphology. Sex ratio analysis also indicated no  
14 quantitative loss of one sex (Extended Data Fig. 1a). In *Caenorhabditis* nematodes, it is known  
15 that gonochoristic species often have sperm that kill the female in interspecific crosses<sup>1</sup>. We  
16 found that *P. pacificus* hermaphrodites crossed with *P. exspectatus* males often died in the  
17 mating period (8 out of 18 crosses), whereas this happened only rarely in the reciprocal cross  
18 (1 out of 17 crosses). Such postmating prezygotic isolation might contribute to the reproductive  
19 isolation of the species.

20 In contrast to these hybrid crosses, we observed large reductions in progeny number  
21 in backcrosses or intercrosses of F1 animals (Fig. 1g and Supplementary Fig. 1). This reduction  
22 might be explained by hybrid sterility of F1 animals or hybrid inviability of BC1 or F2 animals.  
23 The difference in the number of progeny between crosses can be explained by the difference  
24 in hybrid sterility between sexes. Given that males are the heterogametic sex in *Pristionchus*  
25 species, the stronger female sterility of F1 animals is an exception of Haldane's rule. Even if  
26 the sister chromosomes pair properly, F1 female meiosis forms tetravalent chromosomes that  
27 are even more abnormal than trivalent chromosomes in F1 male meiosis (Supplementary Fig.  
28 13).

29 We observed propagation of F1 intercrosses between *P. pacificus* and *P. exspectatus*  
30 in the first experiment (2 out of 4 replication, Fig. 1b). However, the F1 intercross did not  
31 efficiently produced progeny in the second experiment (Supplementary Fig. 1). This is  
32 explained by the number of F1 individuals tested. In the first experiment we used >50 F1  
33 females and males to cross in each replication that produced some viable and fertile hybrids.  
34 In contrast, we used individual animals in the second set of experiments.

35

### 36 **Chromosome evolution in outgroup nematodes.**

37 Synteny analysis with the chromosome-level assembly of different species of  
38 *Caenorhabditis* indicated conserved inter-chromosomal synteny among *Caenorhabditis*  
39 species<sup>2-6</sup>, suggesting that inter-chromosomal rearrangements are rare in these nematodes. In  
40 contrast, recent reports of chromosome-level assemblies of outgroup species of *Caenorhabditis*  
41 suggest more variation of karyotypes in nematodes<sup>7-13</sup>. Tandonnet and her colleagues

42 conducted a meta-analysis of synteny of nematodes<sup>9</sup> that was recently updated<sup>13</sup>. They  
43 identified chromosome fusions and fissions throughout nematode evolution, which can be  
44 explained by rearrangements between seven conserved chromosomal elements that are defined  
45 by sets of conserved genes. The seven elements were designated as ‘Nigon’ elements<sup>9</sup>, which  
46 are analogous to Müller elements in *Drosophila*. *P. pacificus* ChrV, ChrII, ChrIII, ChrIV,  
47 ChrIL, ChrIR and ChrX are corresponding to Nigon elements, NigonA, NigonB, NigonC,  
48 NigonD, NigonE, NigonN and NigonX, respectively<sup>13</sup>. Here, we use the original definition of  
49 Nigon elements<sup>9</sup>. Although Foster and his colleagues used a different definition<sup>10</sup>, Gonzalez de  
50 la Rosa and his colleagues justified the original definition using systematic comparison of  
51 nematode genome<sup>13</sup>.

52 Chromosome evolution across nematodes is summarized in Supplementary Fig. 14.  
53 The chromosome fusions of *P. pacificus* and *P. expectatus* are corresponding to the fusion  
54 between NigonE and NigonN and fusion between NigonN and NigonX, respectively. The  
55 *Caenorhabditis* ancestor also independently underwent the fusion between NigonN and  
56 NigonX. Fused Nigon elements were highly rearranged after the original fusion events, *i. e.*  
57 the *Caenorhabditis* X chromosome (stripe patterns in Supplementary Fig. 14). However,  
58 several chromosome fusions in other nematode lineages lack rearrangements between the fused  
59 Nigon elements, suggesting these fusions are likely very recent, such as in *P. pacificus*. For  
60 example, while an old fusion between NigonD and NigonX was followed by rearrangements  
61 between in the common ancestor of *Brugia malayi* and *Onchocerca volvulus*, the X  
62 chromosome was subsequently fused to NigonE and NigonN in the *B. malayi* and *O. volvulus*  
63 lineage, respectively, but did not undergo rearrangements. In contrast, the lineage of some  
64 nematodes, *Auanema rhodensis*, *Strongyloides ratti*, and *Ascaris suum* underwent complicated  
65 rearrangements.

66 The number of events of chromosome evolution might be underestimated due to small  
67 taxon sampling, as independent fusions between the same combination of elements might go  
68 unnoticed. One clear example for this is the fusion between NigonN and NigonX in the lineage  
69 of *Haemonchus contortus*, which is related to *C. elegans*. Synteny analysis between *H.*  
70 *contortus* and *C. elegans* indicated homologous inter-chromosomal synteny and their  
71 karyotypes were first thought to be highly conserved<sup>12</sup>. However, by synteny analyses with the  
72 other species, Gonzalez de la Rosa and his colleagues reported two lines of evidence that the  
73 fusion of NigonN and NigonX in the *H. contortus* lineage is independent from *C. elegans*<sup>13</sup>.  
74 First, the chromosome-level assembly of *A. rhodensis* and *Oscheius tipulae*, both of which are  
75 more closely related to *H. contortus* than *C. elegans*, indicated that the NigonN and NigonX  
76 are corresponding to different chromosomes. Second, the draft assembly of *Diploscapter*  
77 *coronatus*, which is more closely related to *C. elegans* than *H. contortus*, indicates that long  
78 contigs include NigonX, but not NigonN. Both results suggest that the common ancestor of *H.*  
79 *contortus* and *C. elegans* had no fusion between NigonN and NigonX and that these fusions

80 occurred independently in both lineages. Given that *P. expectatus* also experienced a fusion  
81 between NigonN and NigonX, some combinations of Nigon elements might have an  
82 evolutionary trend to fuse frequently, which makes underestimation of the number of  
83 evolutionary events in parsimonious estimations. More data of different species will improve  
84 our understanding of chromosome evolution of nematodes and can reveal the generality of  
85 findings of the present study.



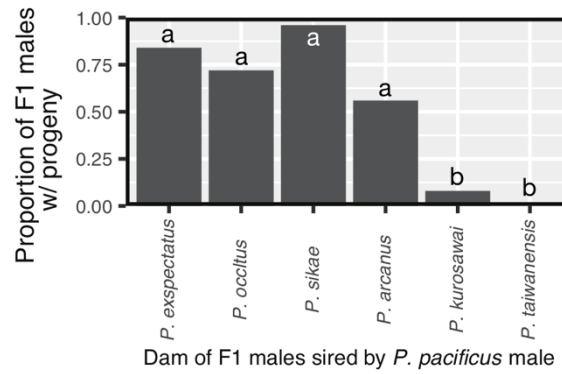

97

98

99

100

101

102

103

104

**Supplementary Fig. 2 | Backcrosses of species hybrids.** F1 males produced by the crosses between *P. pacificus* males and females of related species were backcrossed with females of the same species as their dam. The proportion of the cross with BC1 progeny was investigated in crosses between a single female and a single male ( $N=25$  each). The letter above or on the bar indicates statistically different groups. Any pair from the different group shows significant difference in the proportion using Fisher's exact test (two-tailed  $p < 0.05$ ).

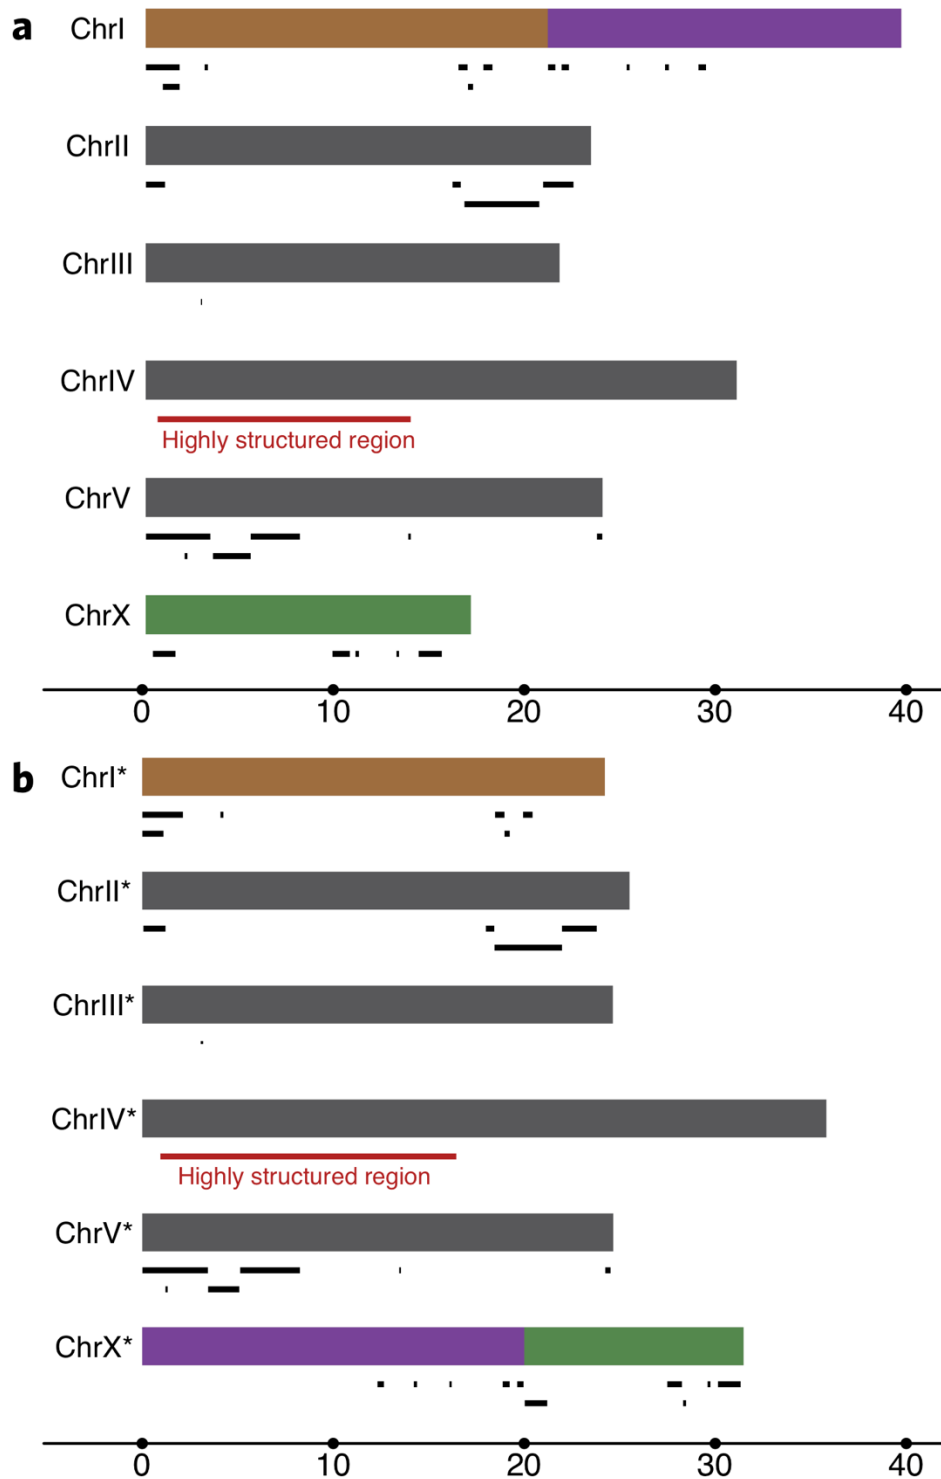

105

106 **Supplementary Fig. 3 | Position of >100kb intrachromosomal rearrangements between *P. pacificus***  
 107 **and *P. expectatus*.** The inversions in coordinates of *P. pacificus* (a) and *P. expectatus* (b) are shown. The  
 108 genomic regions of ChrIL, ChrIR, ChrX and the other chromosomes are represented in orange, purple, green  
 109 and grey rectangles, respectively. Black lines indicate the position of inversions. Red lines indicate the highly  
 110 structured region.



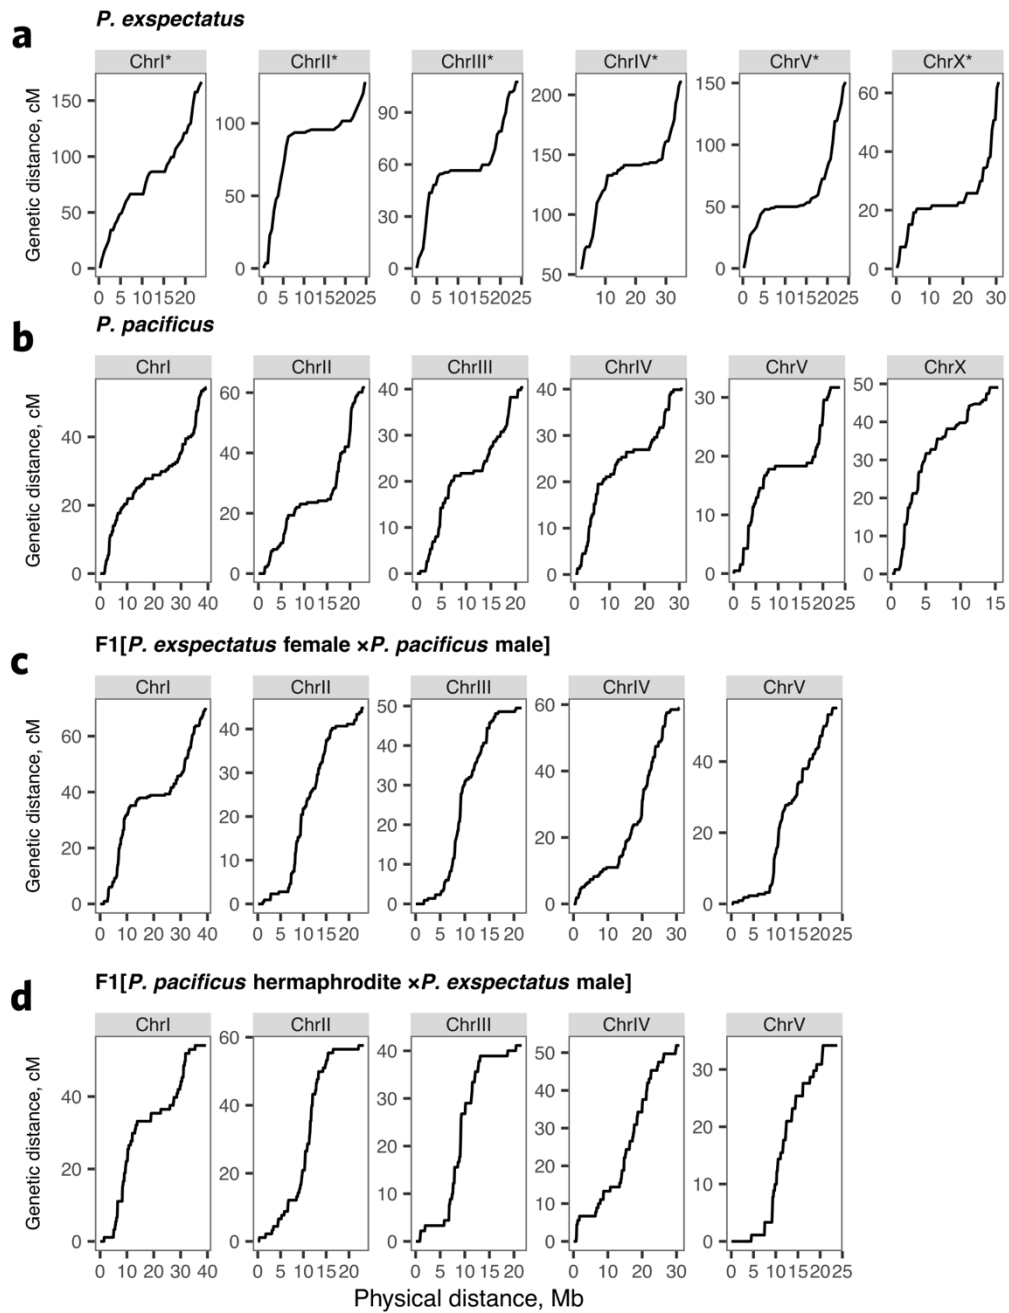

111  
 112 **Supplementary Fig. 4 | Marey map.** The physical distance (Mb) in the genome sequence and genetic  
 113 distance (cM) calculated by linkage analysis from the genetic marker at the left-end of the chromosome are  
 114 compared.

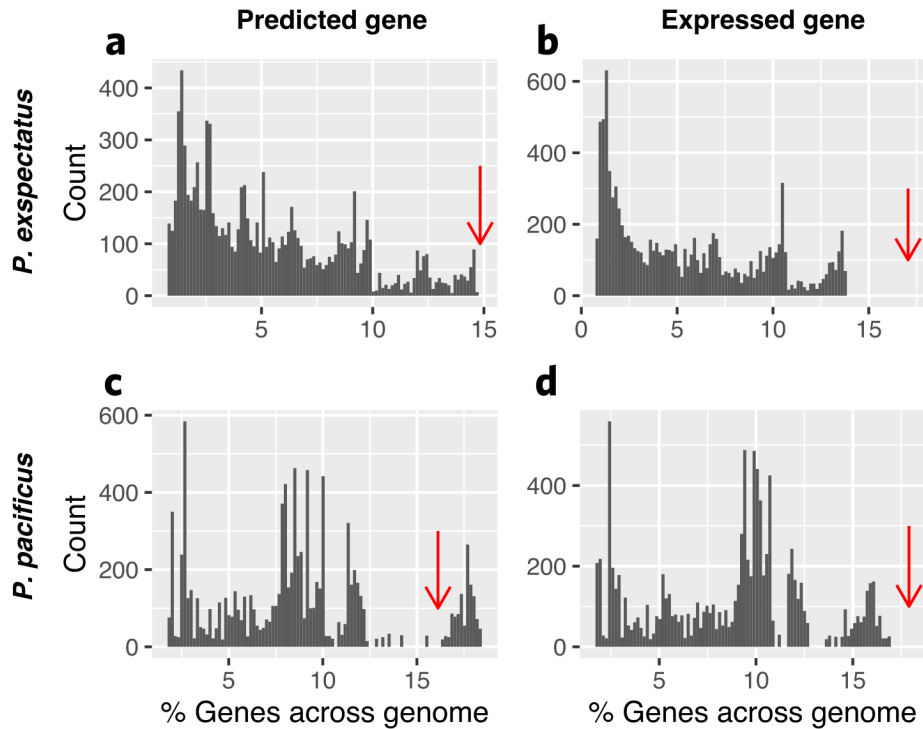

115  
 116 **Supplementary Fig. 5 | Bootstrap test of the percentage of genes in the low recombination region**  
 117 **around the site of chromosome fusions in *P. exspectatus* (a and b) and *P. pacificus* (c and d).** Genomic  
 118 regions with the same genomic distance as the low recombination regions of the chromosome fusions were  
 119 randomly sampled out of the low recombination regions and counted along with the percentage of genes ( $N$   
 120 = 10,000). The predicted genes (a and c) or expressed genes of the young adults (b and d) were used. Silenced  
 121 unfunctional genes are not contained in the expressed genes while the expressed genes may be conditional.  
 122 The percentage of genes in the low-recombination regions around the chromosome fusions are shown as the  
 123 red arrows. The percentage of genes in the low recombination regions is significantly high in a, b and d  
 124 (one-tailed  $p < 0.0001$ ) but not in c (one-tailed  $p > 0.05$ ). The bin number in the figure is 100.

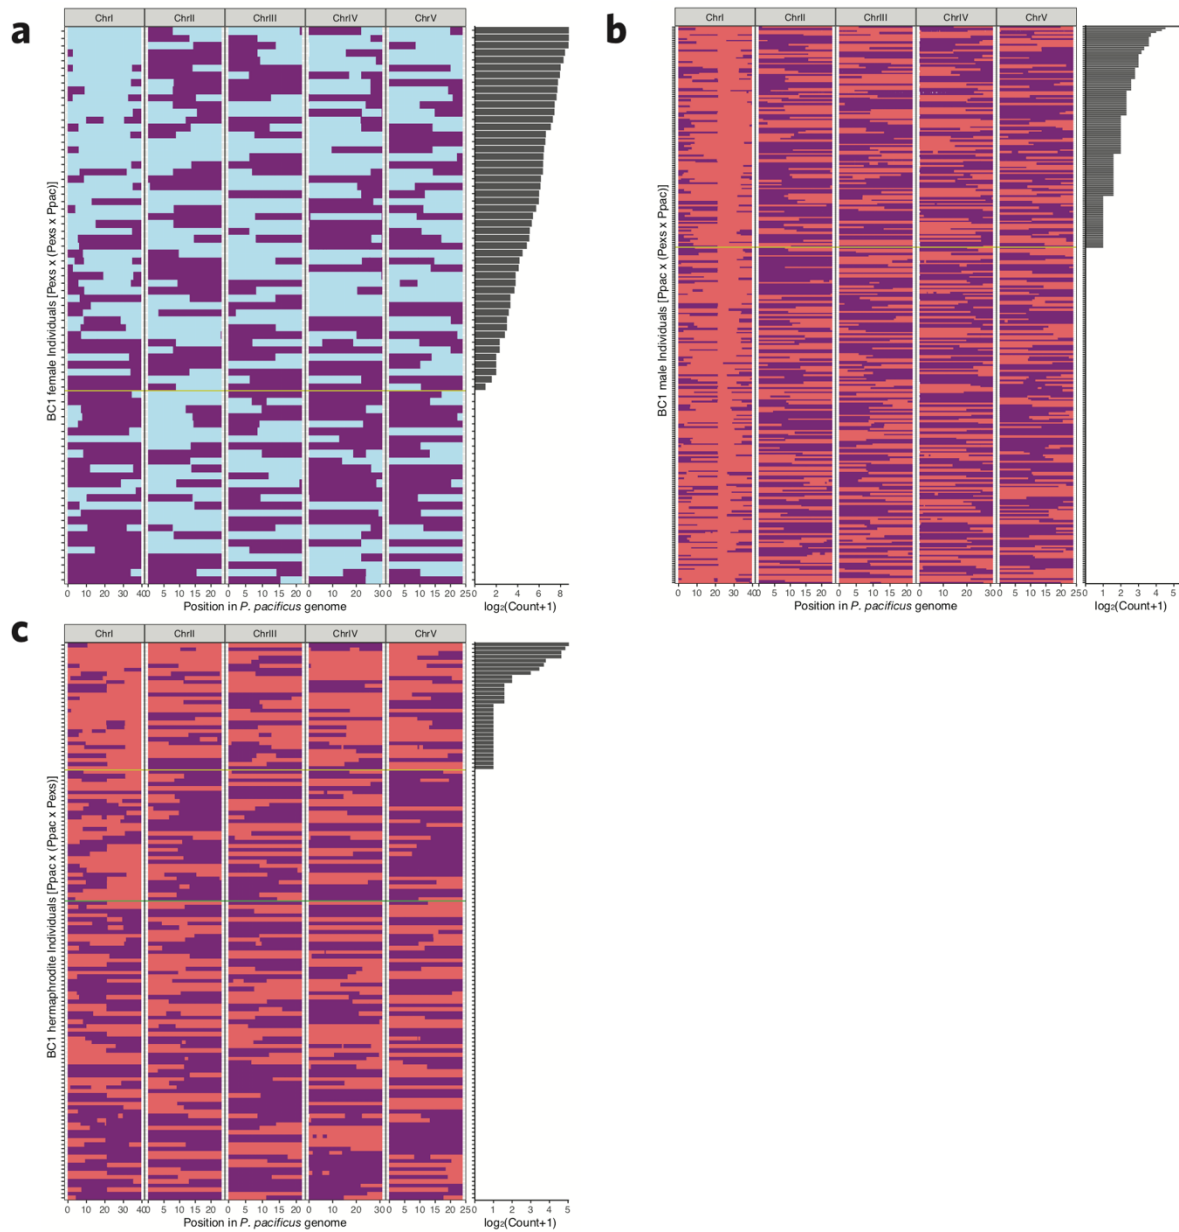

125  
 126 **Supplementary Fig. 6 | Introgression map of BC1 female (a), male (b) and hermaphrodite (c) hybrids.**  
 127 Each row shows the genotypes of each individual. Dark purple indicates regions containing introgression  
 128 allele. Light blue or light red indicate *P. expectatus* or *P. pacificus* background, respectively. The number  
 129 of progeny is shown in the bar plot. The yellow line indicates the boundary of presence/absence of progeny.  
 130 The green line indicates the boundary of presence/absence of eggs in BC1 hermaphrodites.  
 131

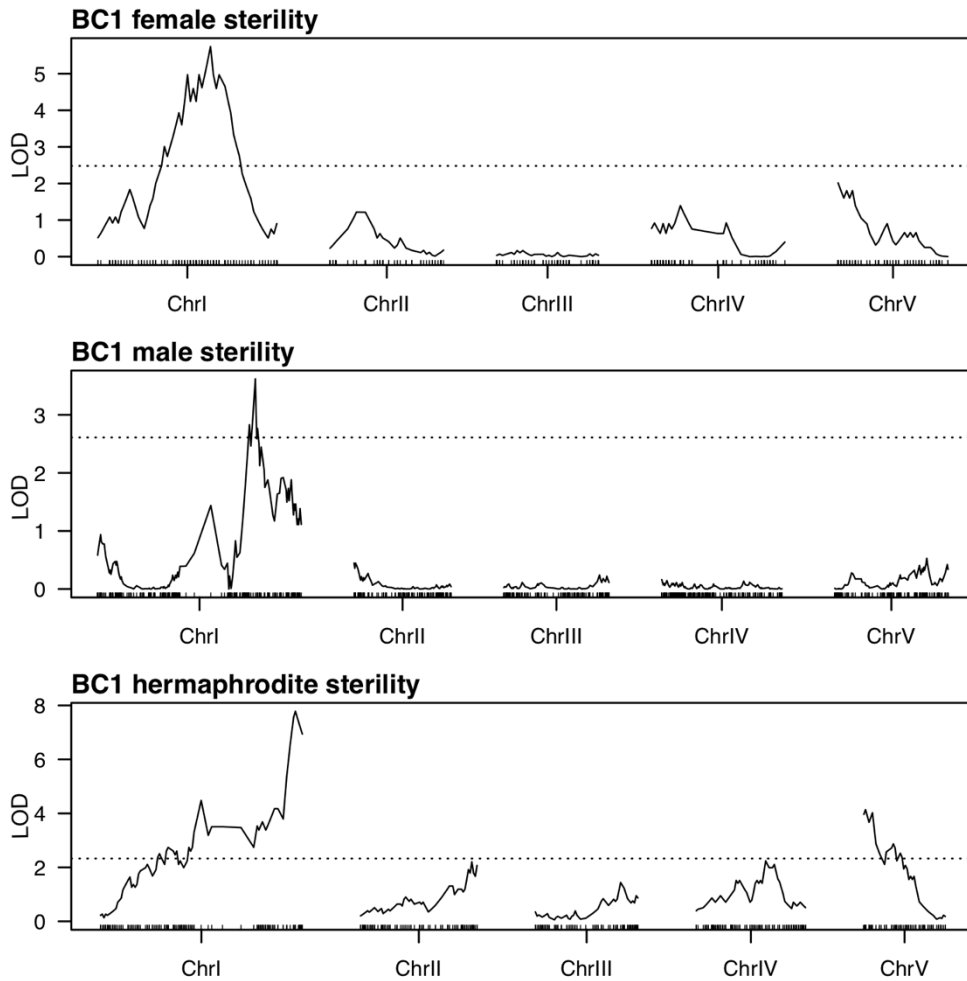

132  
 133  
 134  
 135  
 136  
 137

**Supplementary Fig. 7 | Results of QTL analysis using R/qtl.** Logarithm of odds (LOD) score is shown on the Y-axis. The significant threshold of LOD was calculated by permutation tests ( $N = 1000$ , significant level = 0.05) The bottom ticks indicate the position of genetic markers, which is the genotype of 100kb sliding window of the genome.

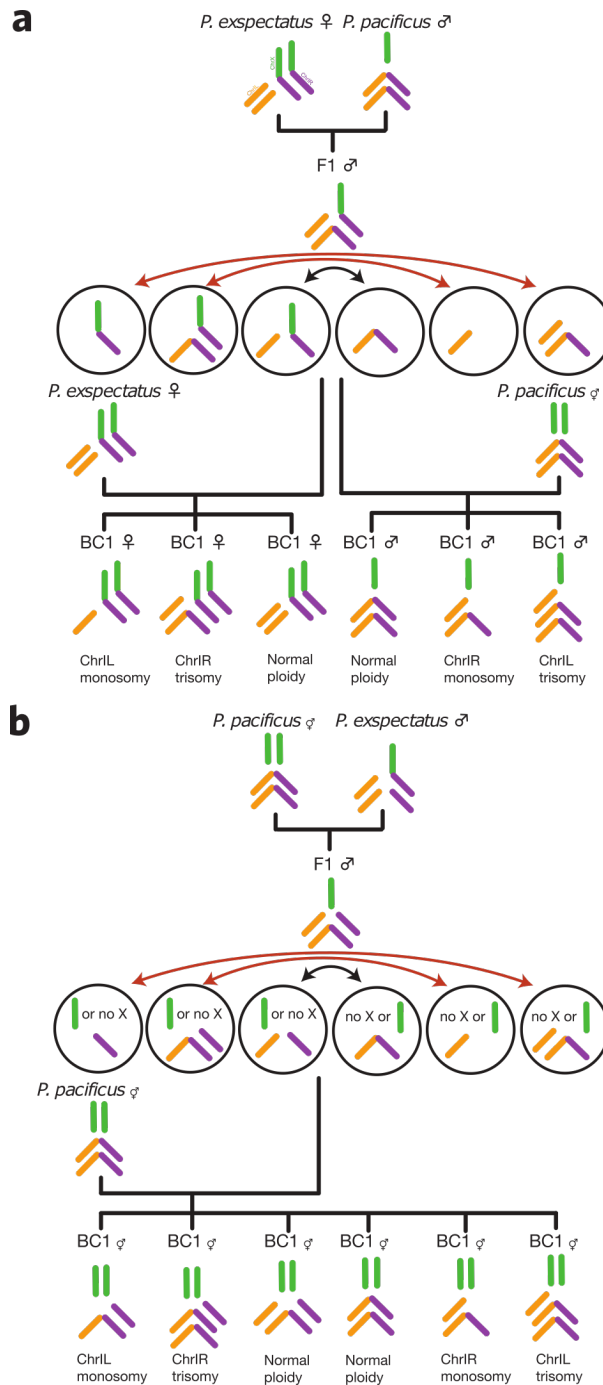

138

139

140

141

142

143

144

**Supplementary Fig. 8 | Expected karyotypes of BC1 animals with aneuploidy. a,** Expected karyotypes of the BC1 females and males after a cross between a *P. expectatus* female and a *P. pacificus* male. **b,** Expected karyotypes of the BC1 hermaphrodites after a cross between a *P. pacificus* hermaphrodite and a *P. expectatus* male. Black and red arrows indicate balanced and unbalanced segregation in F1 meiosis, respectively. Black circles show the haplotypes of sperm cells.

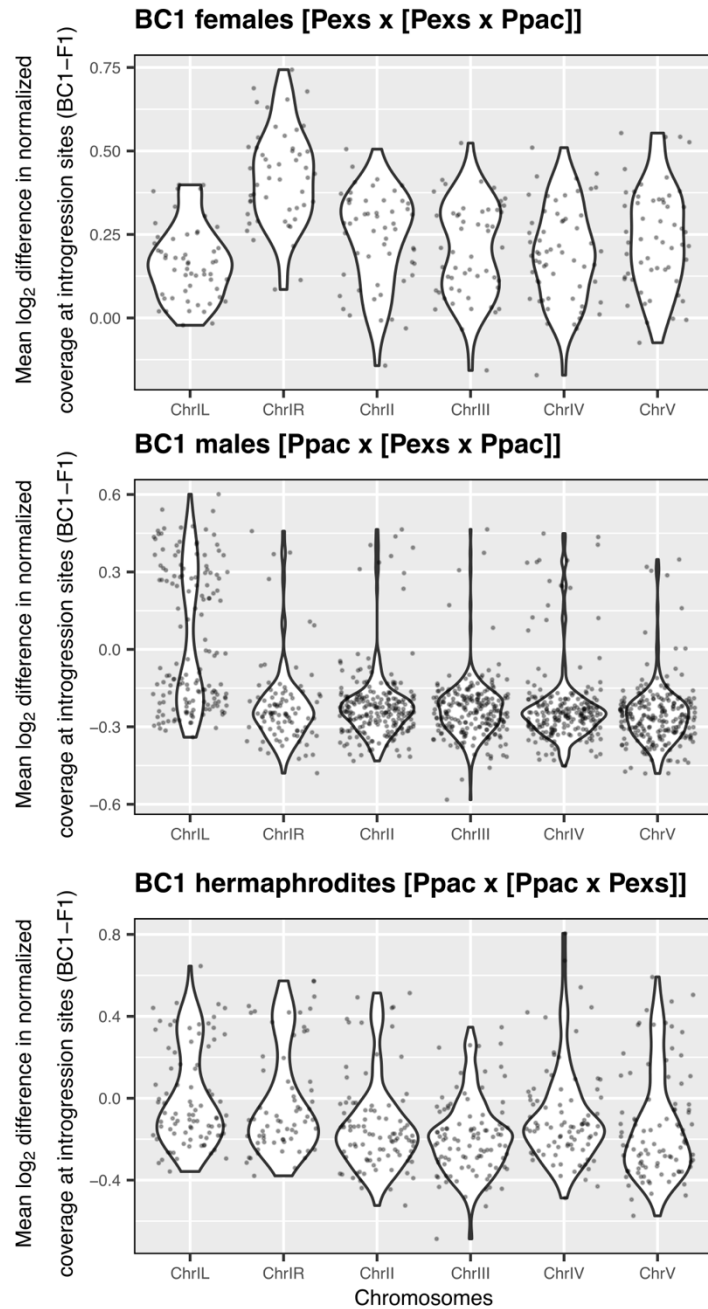

145  
 146 **Supplementary Fig. 9 | Violin plot of increased normalized coverage of genome sequences of BC1**  
 147 **animals.** Because the mapping rate is different between the *P. expectatus* and *P. pacificus* alleles to the *P.*  
 148 *pacificus* reference, only introgression sites, which are heterozygous in diploid, were used to analyze the  
 149 coverage depth. The coverage depth of introgression sites of BC1 was first  $\log_2$ -transformed and normalized  
 150 by average coverage depth and subtracted by the normalized coverage depth of the same site of F1 hybrids.  
 151 The plots show the mean of the  $\log_2$  difference in the coverage depth at introgression sites in the  
 152 chromosomes of single individuals.  
 153

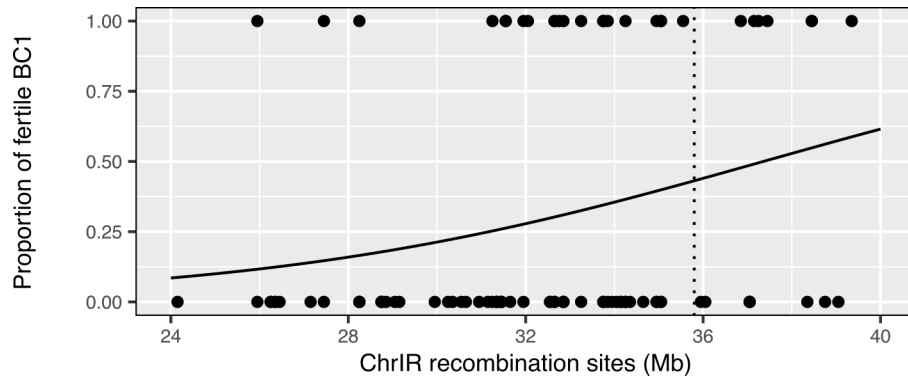

154

155

156

157

158

**Supplementary Fig. 10 | Predicted proportion of fertile BC1 along with recombination sites by a generalized linear model.** The predicted logistic regression is shown as the solid line. The dot line indicates the peak of recombination rate of *P. pacificus* as Fig. 5c. The plots indicate recombination sites of fertile (top) and sterile (bottom) individuals.

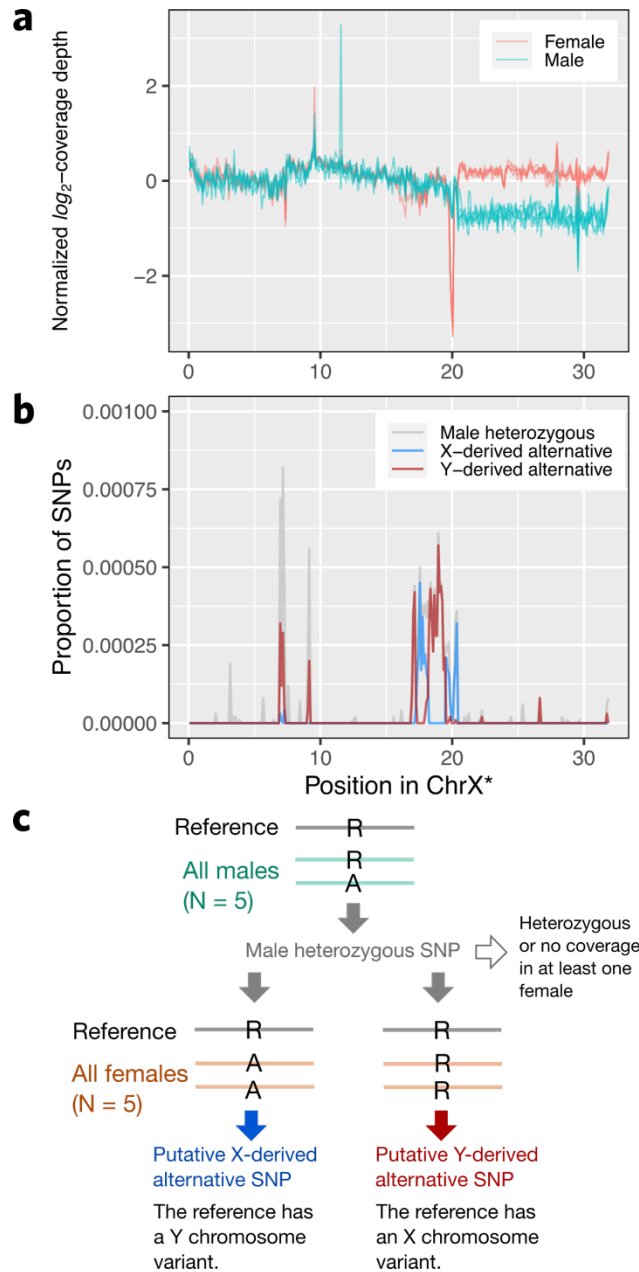

159

160 **Supplementary Fig. 11 | Y-sequence contamination in the assembly before manual fixation.** a, Female-  
 161 specific reduction of coverage of the X chromosome of *P. exspectatus*. Coverage depth of each 100kb sliding  
 162 window is normalized by average coverage and  $\log_2$ -transformed. Each line indicates the value of single  
 163 individuals. b, X-derived alternative SNPs around the fusion breakpoint. The proportion of male-specific  
 164 SNPs, X-derived alternative SNPs and Y-derived alternative SNPs was calculated in each 100kb sliding  
 165 window. c, Method for identification of male heterozygous SNP, X-derived alternative SNPs and Y-derived  
 166 alternative SNPs. R and A represent reference and alternative allele, respectively. The results for the same  
 167 analysis of the final assembly (after the manual fixation) are shown in Extended Data Fig. 8.



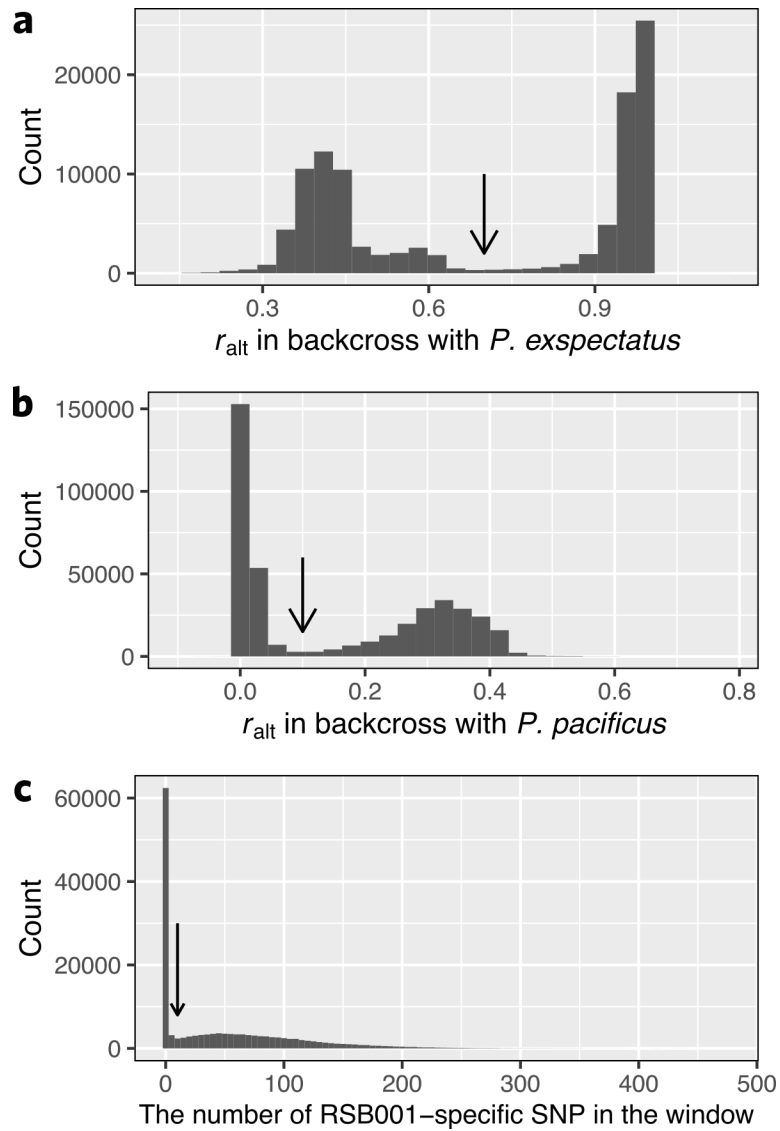

168

169 **Supplementary Figure 12 | Histogram of values to determine the threshold for genotyping.** The  
 170 thresholds were set at the bin with minimum counts between 1 and the next peak (a) or between 0 and the  
 171 next peak (b and c) shown as arrows.

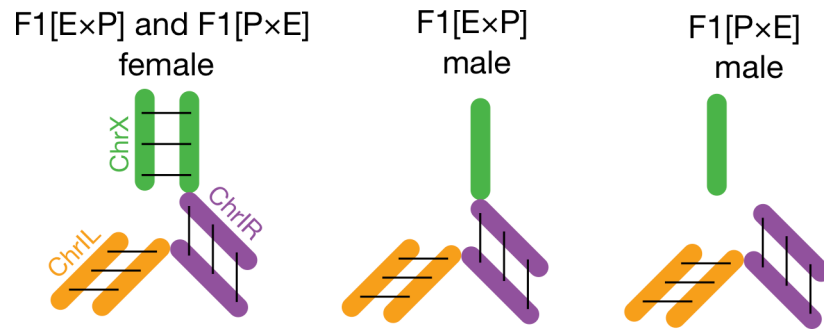

172

173 **Supplementary Figure 13 | Putative abnormal chromosome pairing in F1 meiosis.** Potential regions of

174 synapsis are shown in black lines.

175

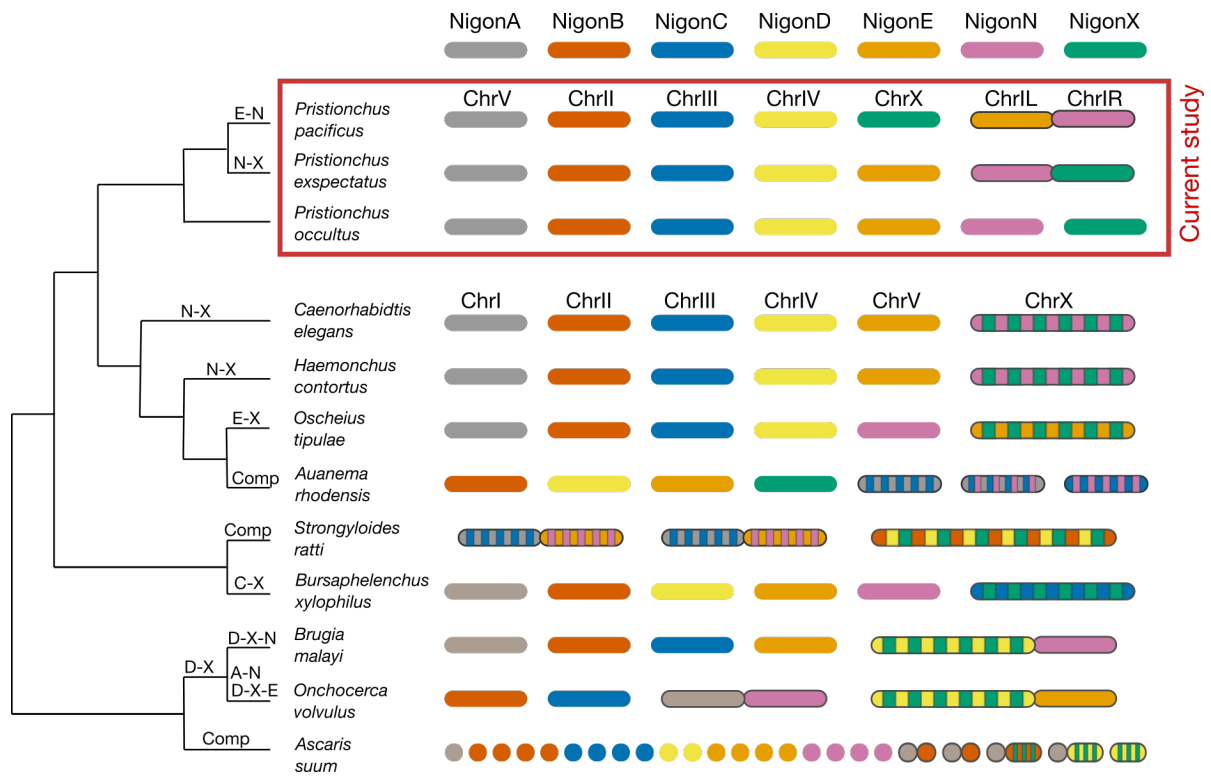

176

177 **Supplementary Figure 14 | Chromosome evolution across Rhabditida.** Chromosomes of each species

178 are shown as bars with colors corresponding to Nigon elements. The black-outlined bars represent fused

179 chromosomes. The stripped color indicates fused Nigon elements having rearrangements with each other.

180 The identification of Nigon elements and estimation of their fusions of out-group species is according to

181 ref.<sup>13</sup>. The phylogeny of the outgroup species is according to ref.<sup>14</sup>. Fusion events between Nigon elements

182 are shown on the branches but the complex rearrangements are shown as "Comp". The chromosome names

183 of *P. pacificus* and *C. elegans* are shown. Note that the order and orientation of chromosomes can be different

184 from the genome assembly of each species.

185

186 **Supplementary Table 1 | Sample number of quantitative reproduction test**

| Experiment <sup>1</sup> | Dam <sup>2</sup>      | Sire <sup>2, 3</sup>  | No. of crosses <sup>4</sup> | No. of crosses with progeny <sup>5</sup> | No of crosses with mature progeny <sup>6</sup> |
|-------------------------|-----------------------|-----------------------|-----------------------------|------------------------------------------|------------------------------------------------|
| A                       | <i>P. pacificus</i>   | <i>P. pacificus</i>   | 18                          | 18                                       | 18                                             |
|                         | <i>P. exspectatus</i> | <i>P. pacificus</i>   | 17                          | 16                                       | 16                                             |
|                         | <i>P. pacificus</i>   | <i>P. exspectatus</i> | 18                          | 17                                       | 17                                             |
|                         | <i>P. exspectatus</i> | <i>P. exspectatus</i> | 17                          | 17                                       | 17                                             |
| B                       | F1[ExP]               | -                     | 19                          | 0                                        | 0                                              |
|                         | F1[ExP]               | <i>P. pacificus</i>   | 17                          | 1                                        | 1                                              |
|                         | F1[ExP]               | <i>P. exspectatus</i> | 18                          | 5                                        | 5                                              |
|                         | <i>P. exspectatus</i> | F1[ExP]               | 30                          | 24                                       | 24                                             |
|                         | <i>P. exspectatus</i> | <i>P. exspectatus</i> | 20                          | 19                                       | 19                                             |
| C                       | F1[PxE]               | -                     | 30                          | 0                                        | 0                                              |
|                         | F1[PxE]               | <i>P. pacificus</i>   | 20                          | 11                                       | 6                                              |
|                         | F1[PxE]               | <i>P. exspectatus</i> | 20                          | 18                                       | 13                                             |
|                         | <i>P. exspectatus</i> | F1[PxE]               | 20                          | 17                                       | 17                                             |
|                         | <i>P. exspectatus</i> | <i>P. exspectatus</i> | 20                          | 19                                       | 19                                             |
| D                       | F1[ExP]               | F1[ExP]               | 25                          | 5                                        | 3                                              |
|                         | F1[PxE]               | F1[PxE]               | 25                          | 8                                        | 3                                              |

187 <sup>1</sup>A, hybrid crosses between *P. pacificus* and *P. exspectatus*; B, backcrosses with F1 animals produced by a  
 188 cross between a *P. exspectatus* female and a *P. pacificus* male; C, backcrosses with F1 animals produced by  
 189 a cross between a *P. pacificus* hermaphrodite and a *P. exspectatus* male; D, intercross of F1 hybrids.

190 <sup>2</sup> F1[ExP], F1 produced by a cross between a *P. exspectatus* female and *P. pacificus* male; F1[PxE], F1  
 191 produced by a cross between a *P. pacificus* hermaphrodite and *P. exspectatus* male.

192 <sup>3</sup>, hyphen indicates that no males were used to test self-fertilization.

193 <sup>4</sup>, the sample number of panels c, d, f, g, i and j of Fig. 2 and panel a and b of Supplementary Fig. 1

194 <sup>5</sup>, the sample number of panels e, h, and k of Fig. 2 and panel c of Supplementary Fig. 1

195 <sup>6</sup>, the sample number of Extended Data Fig. 1

196

197

198 **Supplementary Table 2 | Statistics of genome assembly and gene annotations**

| Species                                   | <i>P. expectatus</i>       |                                          | <i>P. pacificus</i>                            |
|-------------------------------------------|----------------------------|------------------------------------------|------------------------------------------------|
|                                           | Version of genome sequence | Prabh <i>et al.</i> , 2018 <sup>15</sup> | Rödelsperger <i>et al.</i> , 2017 <sup>8</sup> |
| Version of gene annotation                | Present study              | Rödelsperger, 2021 <sup>16</sup>         | Athanasouli <i>et al.</i> , 2020 <sup>17</sup> |
| <b>Total length</b>                       | 169.6Mb                    | 177.7Mb                                  | 158.5Mb                                        |
| <b>Contig Number</b>                      | 24                         | 4412                                     | 47                                             |
| <b>N50</b>                                | 25.5Mb                     | 0.142Mb                                  | 21.7Mb                                         |
| <b>% of the largest 6 contigs</b>         | 98.1%                      | 3.01%                                    | 98.7%                                          |
| <b>Total gene number</b>                  | 31,021                     | 35,595                                   | 28,896                                         |
| <b>BUSCO odb9 C/D/F/M (%)<sup>1</sup></b> | 90/3/4/4                   | 85/7/5/4                                 | 97/2/2/0                                       |

199 <sup>1</sup>C, complete as a single-copy gene; D, duplicated; F, fragmented; M, missing.

200

201 **Supplementary Table 3 | The number of crosses for QTL analysis**

| Test                            | Generation <sup>1</sup> | Female or hermaphrodites |         |     | Male                  |                     |     | No. cross | Analyzed samples <sup>3</sup> |
|---------------------------------|-------------------------|--------------------------|---------|-----|-----------------------|---------------------|-----|-----------|-------------------------------|
|                                 |                         | Species                  | Strain  | No. | Species               | Strain <sup>2</sup> | No. |           |                               |
| QTL for female sterility        | 1st                     | <i>P. exspectatus</i>    | RS5522B | 3   | <i>P. pacificus</i>   | PS312               | 6   | 3         |                               |
|                                 | 2nd                     | <i>P. exspectatus</i>    | RS5522B | 1   | F1 hybrid             | -                   | 1   | 30        |                               |
|                                 | 3rd (T)                 | BC1 hybrid               | -       | 1   | <i>P. exspectatus</i> | RS5522B             | 1   | 75        | N=75                          |
| QTL for male sterility          | 1st                     | <i>P. exspectatus</i>    | RS5522B | 3   | <i>P. pacificus</i>   | RS3066 [RFP+]       | 6   | 2         |                               |
|                                 | 2nd                     | <i>P. pacificus</i>      | PS312   | 3   | F1 hybrid             | [RFP+]              | 3   | 49        |                               |
|                                 | 3rd (T)                 | <i>P. pacificus</i>      | PS312   | 1   | BC1 hybrid            | [RFP+]              | 1   | 312       | N=291                         |
| QTL for hermaphrodite sterility | 1st                     | <i>P. pacificus</i>      | PS312   | 3   | <i>P. exspectatus</i> | RS5522B             | 6   | 8         |                               |
|                                 | 2nd                     | <i>P. pacificus</i>      | PS312   | 1   | F1 hybrid             | -                   | 1   | 171       |                               |
|                                 | 3rd (T)                 | BC1 hybrid               | -       | 1   | No male               | -                   | 0   | 183       | N=136                         |

202 <sup>1</sup>T, cross for the test of BC1 fertility.

203 <sup>2</sup> [RFP+], selected individuals with the reporter genes, RFP,

204 <sup>3</sup> The number of analyzed samples is different from the number of crosses because of the death of animals  
 205 during the test, low quality of WGS library and removal of self-progeny.

206

207 **Supplementary Table 4 | The number of trisomy animals of expected chromosomes in BC1**

| Cross <sup>1</sup> | Sex           | Expected chromosome | Threshold | <i>N</i> | No. of trisomy of the expected chromosome | Median no. of trisomy of the other chromosomes | median <i>p</i> -value <sup>2</sup>      |
|--------------------|---------------|---------------------|-----------|----------|-------------------------------------------|------------------------------------------------|------------------------------------------|
| E × (E × P)        | Female        | ChrIR               | 0.35      | 75       | 34 [45%]                                  | 11 [18.4%]                                     | <b><i>p</i> = 6.9 × 10<sup>-5</sup></b>  |
| P × (E × P)        | Male          | ChrIL               | 0         | 291      | 64 [22%]                                  | 8 [2.7%]                                       | <b><i>p</i> = 2.8 × 10<sup>-13</sup></b> |
| P × (P × E)        | Hermaphrodite | ChrIL               | 0.25      | 136      | 19 [14%]                                  | 7.5 [5.5%]                                     | <b><i>p</i> = 0.031</b>                  |
|                    |               | ChrIR               | 0.25      | 136      | 14 [10%]                                  | 7.5 [5.5%]                                     | <i>p</i> = 0.21                          |

208 <sup>1</sup>, E or P from left to right indicates species of dam, grandam and grandsire. E, *P. exspectatus*; P, *P. pacificus*.

209 <sup>2</sup>, the median of two-tailed *p*-value of Fisher's exact test of Trisomy (Yes or No) vs. expected/other  
 210 chromosomes

211

212 **Supplementary Table 5 | Association of trisomy with fertility of BC1 animals**

| Cross <sup>1</sup> | Sex           | Region | Trisomy | Total no. | Progeny      |             | <i>p</i> -value <sup>2</sup> |
|--------------------|---------------|--------|---------|-----------|--------------|-------------|------------------------------|
|                    |               |        |         |           | Presence [%] | Absence [%] |                              |
| E × (E × P)        | Female        | ChrIR  | Yes     | 34        | 15 [44%]     | 19 [57%]    | <b><i>p</i> = 0.00061</b>    |
|                    |               |        | No      | 41        | 34 [83%]     | 7 [15%]     |                              |
| P × (E × P)        | Male          | ChrIL  | Yes     | 64        | 23 [36%]     | 41 [64%]    | <i>p</i> = 0.56              |
|                    |               |        | No      | 227       | 93 [41%]     | 134 [59%]   |                              |
| P × (P × E)        | Hermaphrodite | ChrIL  | Yes     | 19        | 6 [32%]      | 13 [68%]    | <i>p</i> = 0.38              |
|                    |               |        | No      | 117       | 25 [21%]     | 92 [79%]    |                              |
|                    |               | ChrIR  | Yes     | 14        | 2 [14%]      | 12 [86%]    | <i>p</i> = 0.52              |
|                    |               |        | No      | 122       | 29 [24%]     | 93 [76%]    |                              |

213 <sup>1</sup>, E or P from left to right indicates species of dam, grandam and grandsire. E, *P. exspectatus*; P, *P. pacificus*.

214 <sup>2</sup>, two-tailed *p*-value of Fisher's exact test of Trisomy (Yes or No) vs. Presence/absence of progeny

215



216 **Supplementary Table 6 | The number of individuals in the first crossing experiment between *P.***  
 217 ***exspectatus* and *P. pacificus*.**

| Replication      | Stages         | Sex <sup>1</sup> | No. of individuals |            |            |            |            |            |
|------------------|----------------|------------------|--------------------|------------|------------|------------|------------|------------|
|                  |                |                  | Day 5 <sup>2</sup> | Day 10     | Day 15     | Day 20     | Day 25     | Day 30     |
| R1               | Adult          | H or F           | 39                 | 26         | 39         | 34         | 27         | 27         |
|                  |                | M                | 93                 | 72         | 81         | 79         | 49         | 46         |
|                  | J4 juvenile    | H or F           | 8                  | 1          | 1          | 0          | 0          | 1          |
|                  |                | M                | 28                 | 2          | 4          | 2          | 1          | 3          |
|                  | J2-J3 juvenile |                  | 77                 | 9          | 10         | 1          | 4          | 7          |
|                  | <b>Total</b>   |                  |                    | <b>245</b> | <b>110</b> | <b>135</b> | <b>116</b> | <b>81</b>  |
| <b>Sex ratio</b> |                |                  | <b>77%</b>         | <b>74%</b> | <b>69%</b> | <b>70%</b> | <b>65%</b> | <b>65%</b> |
| R2               | Adult          | H or F           | 70                 | 48         | 74         | 59         | 71         | 33         |
|                  |                | M                | 54                 | 55         | 55         | 54         | 65         | 34         |
|                  | J4 juvenile    | H or F           | 27                 | 2          | 0          | 2          | 1          | 1          |
|                  |                | M                | 61                 | 4          | 5          | 3          | 1          | 2          |
|                  | J2-J3 juvenile |                  | 143                | 19         | 13         | 12         | 7          | 6          |
|                  | <b>Total</b>   |                  |                    | <b>355</b> | <b>128</b> | <b>147</b> | <b>130</b> | <b>145</b> |
| <b>Sex ratio</b> |                |                  | <b>67%</b>         | <b>56%</b> | <b>45%</b> | <b>50%</b> | <b>49%</b> | <b>53%</b> |
| R3               | Adult          | H or F           | 24                 | 15         | 21         | 14         | 10         | 10         |
|                  |                | M                | 20                 | 16         | 13         | 8          | 11         | 4          |
|                  | J4 juvenile    | H or F           | 3                  | 1          | 0          | 0          | 0          | 0          |
|                  |                | M                | 7                  | 1          | 0          | 0          | 0          | 0          |
|                  | J2-J3 juvenile |                  | 41                 | 11         | 3          | 2          | 0          | 0          |
|                  | <b>Total</b>   |                  |                    | <b>95</b>  | <b>44</b>  | <b>37</b>  | <b>24</b>  | <b>21</b>  |
| <b>Sex ratio</b> |                |                  | <b>56%</b>         | <b>55%</b> | <b>38%</b> | <b>36%</b> | <b>52%</b> | <b>29%</b> |
| R4               | Adult          | H or F           | 92                 | 78         | 84         | 83         | 55         | 33         |
|                  |                | M                | 103                | 132        | 131        | 71         | 21         | 10         |
|                  | J4 juvenile    | H or F           | 4                  | 0          | 0          | 1          | 0          | 0          |
|                  |                | M                | 78                 | 5          | 1          | 0          | 1          | 1          |
|                  | J2-J3 juvenile |                  | 47                 | 14         | 9          | 10         | 6          | 1          |
|                  | <b>Total</b>   |                  |                    | <b>324</b> | <b>229</b> | <b>225</b> | <b>165</b> | <b>83</b>  |
| <b>Sex ratio</b> |                |                  | <b>67%</b>         | <b>64%</b> | <b>61%</b> | <b>46%</b> | <b>29%</b> | <b>25%</b> |

218 (continued)

219 <sup>1</sup>, H or F, hermaphrodite or female; M, male. <sup>2</sup>, the number of individuals reduces after Day 5 because only  
 220 25% of individuals were transferred between Day 5 and Day 10.

221 **Supplementary Table 6 (continued)**

| Replication      | Stages         | Sex <sup>1</sup> | No. of individuals |            |            |            |            |           |
|------------------|----------------|------------------|--------------------|------------|------------|------------|------------|-----------|
|                  |                |                  | Day 5 <sup>2</sup> | Day 10     | Day 15     | Day 20     | Day 25     | Day 30    |
| R5               | Adult          | H or F           | 104                | 72         | 76         | 47         | 37         | 17        |
|                  |                | M                | 65                 | 56         | 62         | 53         | 27         | 10        |
|                  | J4 juvenile    | H or F           | 43                 | 2          | 1          | 1          | 0          | 0         |
|                  |                | M                | 60                 | 1          | 0          | 1          | 0          | 0         |
|                  | J2-J3 juvenile |                  | 131                | 14         | 7          | 0          | 0          | 0         |
|                  | <b>Total</b>   |                  | <b>403</b>         | <b>145</b> | <b>146</b> | <b>102</b> | <b>64</b>  | <b>27</b> |
| <b>Sex ratio</b> |                | <b>62%</b>       | <b>45%</b>         | <b>45%</b> | <b>54%</b> | <b>42%</b> | <b>37%</b> |           |
| R6               | Adult          | H or F           | 71                 | 49         | 46         | 30         | 20         | 8         |
|                  |                | M                | 29                 | 24         | 22         | 20         | 16         | 28        |
|                  | J4 juvenile    | H or F           | 30                 | 0          | 0          | 1          | 0          | 0         |
|                  |                | M                | 34                 | 0          | 0          | 0          | 3          | 0         |
|                  | J2-J3 juvenile |                  | 123                | 2          | 4          | 1          | 1          | 0         |
|                  | <b>Total</b>   |                  | <b>287</b>         | <b>75</b>  | <b>72</b>  | <b>52</b>  | <b>40</b>  | <b>36</b> |
| <b>Sex ratio</b> |                | <b>57%</b>       | <b>33%</b>         | <b>32%</b> | <b>41%</b> | <b>49%</b> | <b>78%</b> |           |
| R7               | Adult          | H or F           | 83                 | 38         | 53         | 54         | 45         | 26        |
|                  |                | M                | 91                 | 46         | 36         | 45         | 27         | 11        |
|                  | J4 juvenile    | H or F           | 8                  | 1          | 2          | 1          | 2          | 1         |
|                  |                | M                | 37                 | 2          | 2          | 0          | 2          | 1         |
|                  | J2-J3 juvenile |                  | 35                 | 7          | 5          | 6          | 12         | 9         |
|                  | <b>Total</b>   |                  | <b>254</b>         | <b>94</b>  | <b>98</b>  | <b>106</b> | <b>88</b>  | <b>48</b> |
| <b>Sex ratio</b> |                | <b>62%</b>       | <b>56%</b>         | <b>43%</b> | <b>46%</b> | <b>41%</b> | <b>33%</b> |           |
| R8               | Adult          | H or F           | 28                 | 21         | 18         | 11         | 7          | 6         |
|                  |                | M                | 18                 | 15         | 18         | 13         | 3          | 2         |
|                  | J4 juvenile    | H or F           | 8                  | 0          | 0          | 0          | 0          | 0         |
|                  |                | M                | 20                 | 0          | 0          | 0          | 0          | 0         |
|                  | J2-J3 juvenile |                  | 82                 | 3          | 2          | 0          | 0          | 0         |
|                  | <b>Total</b>   |                  | <b>156</b>         | <b>39</b>  | <b>38</b>  | <b>24</b>  | <b>10</b>  | <b>8</b>  |
| <b>Sex ratio</b> |                | <b>62%</b>       | <b>42%</b>         | <b>50%</b> | <b>54%</b> | <b>30%</b> | <b>25%</b> |           |

222 <sup>1</sup>, H or F, hermaphrodite or female; M, male. <sup>2</sup>, the number of individuals reduces after Day 5 because only  
 223 25% of individuals were transferred between Day 5 and Day 10.

224 **Supplementary Table 7 | FISH probes**

|       | Probe Name    | Modification | Sequence                 |
|-------|---------------|--------------|--------------------------|
| ChrIL | PpacChrILpA01 | DY415        | CCAGTGCTTCCACAACCGAA     |
|       | PpacChrILpA02 | DY415        | CCCTCGACTAGCGGTCTAC      |
|       | PpacChrILpA03 | DY415        | CACCGAGCCAAGCACCTCTG     |
|       | PpacChrILpA04 | DY415        | CTTCCACAACCGAGCCCTCG     |
|       | PpacChrILpA05 | DY415        | ACCAGTGCTTCCACAACCGA     |
| ChrIR | PpacChrIRpA01 | Fluorescein  | GTGCTTCCCTCGGTGCTCATC    |
|       | PpacChrIRpA02 | Fluorescein  | GAGAATTCAGTCGATGATGGAG   |
|       | PpacChrIRpA03 | Fluorescein  | TTCGACCATCGAGCCCACCTCTAC |
| ChrX  | PpacChrXpA01  | Cy3          | ACATGTCGTCCTCAATACATC    |
|       | PpacChrXpA02  | Cy3          | GTTTCTTGACGTGATCTTGA     |
|       | PpacChrXpA03  | Cy3          | ACACAATAGGCACATACGTGA    |
|       | PpacChrXpA04  | Cy3          | ACCACTGAGCTAACAGGGCTC    |
|       | PpacChrXpA05  | Cy3          | GTAGAGCATCAGACTTTTAAT    |
|       | PpacChrXpA06  | Cy3          | TCGAACCACCGTCCTCCAGAT    |
|       | PpacChrXpA07  | Cy3          | GATTCCACTACGAGGCTTAAC    |

225

226

227 **References**

- 228 1. Ting, J. J. et al. Intense sperm-mediated sexual conflict promotes reproductive isolation in  
229 *Caenorhabditis* nematodes. *PLoS Biol.* **12**, e1001915 (2014).
- 230 2. Yin, D. et al. Rapid genome shrinkage in a self-fertile nematode reveals sperm competition proteins.  
231 *Science* **359**, 55-61 (2018).
- 232 3. Stevens, L. et al. The genome of *Caenorhabditis bovis*. *Curr. Biol.* **30**, 1023-1031. e4 (2020).
- 233 4. Teterina, A. A., Willis, J. H. & Phillips, P. C. Chromosome-level assembly of the *Caenorhabditis*  
234 *remanei* genome reveals conserved patterns of nematode genome organization. *Genetics* **214**, 769-780  
235 (2020).
- 236 5. Noble, L. M. et al. Selfing is the safest sex for *Caenorhabditis tropicalis*. *eLife* **10**, e62587 (2021).
- 237 6. Stevens, L. et al. Chromosome-level reference genomes for two strains of *Caenorhabditis briggsae*: an  
238 improved platform for comparative genomics. *Genome Biol. Evol.* **14**, evac042 (2022).
- 239 7. Cotton, J. A. et al. The genome of *Onchocerca volvulus*, agent of river blindness. *Nat. Microbiol.* **2**, 1-  
240 12 (2016).
- 241 8. Rödelsperger, C. et al. Single-molecule sequencing reveals the chromosome-scale genomic architecture  
242 of the nematode model organism *Pristionchus pacificus*. *Cell Rep.* **21**, 834-844 (2017).
- 243 9. Tandonnet, S. et al. Chromosome-wide evolution and sex determination in the three-sexed nematode  
244 *Auanema rhodensis*. *G3: Genes Genomes Genet.* **9**, 1211-1230 (2019).
- 245 10. Foster, J. M. et al. Sex chromosome evolution in parasitic nematodes of humans. *Nat. Commun.* **11**, 1-  
246 12 (2020).
- 247 11. Wang, J. et al. Comprehensive chromosome end remodeling during programmed DNA elimination.  
248 *Curr. Biol.* **30**, 3397-3413. e4 (2020).
- 249 12. Doyle, S. R. et al. Genomic and transcriptomic variation defines the chromosome-scale assembly of  
250 *Haemonchus contortus*, a model gastrointestinal worm. *Commun. Biol.* **3**, 1-16 (2020).
- 251 13. Gonzalez de la Rosa, P. M. et al. A telomere-to-telomere assembly of *Oscheius tipulae* and the  
252 evolution of rhabditid nematode chromosomes. *G3: Genes Genomes Genet.* **11**, jkaa020 (2021).
- 253 14. Blaxter, M. & Koutsovoulos, G. The evolution of parasitism in Nematoda. *Parasitol.* **142**, S26-S39  
254 (2015).
- 255 15. Prabh, N. et al. Deep taxon sampling reveals the evolutionary dynamics of novel gene families in  
256 *Pristionchus* nematodes. *Genome Res.* **28**, 1664-1674 (2018).
- 257 16. Rödelsperger, C. The community-curated *Pristionchus pacificus* genome facilitates automated gene  
258 annotation improvement in related nematodes. *BMC Genomics* **22**, 1-12 (2021).
- 259 17. Athanasouli, M. et al. Comparative genomics and community curation further improve gene  
260 annotations in the nematode *Pristionchus pacificus*. *BMC genomics* **21**, 1-9 (2020).

261
